# Supplementary material for: Programmable protein delivery with a bacterial contractile injection system
Source: PubMed Central journal article supplement (PMC10097599; doi:10.1038/s41586-023-05870-7), 2023-03-29
Supplement: 41586_2023_5870_MOESM1_ESM.pdf [file 41586_2023_5870_MOESM1_ESM.pdf]

**Supplementary information**

---

**Programmable protein delivery with a bacterial contractile injection system**

---

In the format provided by the authors and unedited

## Supplementary Information

### Programmable protein delivery with a bacterial contractile injection system

Joseph Kreitz<sup>1,2,3,4,5</sup>, Mirco J. Friedrich<sup>1,2,3,4,5</sup>, Akash Guru<sup>1,2,3,4,5</sup>, Blake Lash<sup>1,2,3,4,5</sup>, Makoto Saito<sup>1,2,3,4,5</sup>, Rhiannon K Macrae<sup>1,2,3,4,5</sup>, and Feng Zhang<sup>1,2,3,4,5</sup>†

(1) Howard Hughes Medical Institute, Cambridge, MA 02139, USA

(2) Broad Institute of MIT and Harvard, Cambridge, MA 02142, USA

(3) McGovern Institute for Brain Research at MIT, Cambridge, MA 02139, USA

(4) Department of Brain and Cognitive Science, Massachusetts Institute of Technology, Cambridge, MA 02139, USA

(5) Department of Biological Engineering, Massachusetts Institute of Technology, Cambridge, MA 02139, USA

† Correspondence should be addressed to F.Z. ([zhang@broadinstitute.org](mailto:zhang@broadinstitute.org)).

## Table of contents

|                            |    |
|----------------------------|----|
| Supplementary Figures..... | 3  |
| Supplementary Tables.....  | 5  |
| Supplementary Data.....    | 13 |
| References.....            | 14 |

## Supplementary Figures

**Supplementary Figure 1** | Uncropped images for all gels and immunoblots depicted in the main figures and Extended Data figures.

**a**, Coomassie gel from Fig. 1c depicting purified PVC complexes.

**b**, Immunoblot from Fig. 1e depicting Pdp1 and non-native payloads (GFP, Cre, and a ZFN) loaded into PVC particles. Because Pvc12 (baseplate) is found in equal multiplicity between each PVC complex, we also stained against this protein to serve as a loading control for this blot.

**c**, Coomassie gel from Extended Data Fig. 1e verifying the importance of regulatory genes (*PAU\_RS16570-RS24015*) in the recovery of PVC complexes from *E. coli*.

**d**, Immunoblot from Extended Data Fig. 1h showing that a structural component of the PVC (Pvc12) is still expressed in the absence of *PAU\_RS16570-RS24015*.

**e**, Immunoblots from Extended Data Fig. 4b used for dose determination in the experiment of Extended Data Fig. 4a

**f**, Immunoblot from Extended Data Fig. 3c depicting the loading properties of truncated variants of Pdp1. As in (b), Pvc12 was used as a loading control for this blot.

**g**, Immunoblot from Extended Data Fig. 3d depicting the loading properties of truncated variants of Pnf. Note that because Pnf is more sparse in the sample than Pvc12 or Pdp1, to visualize the Pnf bands while avoiding signal saturation in the Pvc12 bands we used two different exposure times for this figure; this is noted in the figure margins. As in (b) and (f), Pvc12 was also used as a loading control for this blot.

**h**, Immunoblots from Extended Data Fig. 5b implicating the CTD of Pvc13 as the target recognition domain. Because our purification method removes unloaded proteins (see Extended Data Fig. 3a), the presence of payload protein in all three conditions (shown via a separate Cre blot) confirmed these samples all contained assembled PVC complexes.

**i**, Immunoblot from Extended Data Fig. 7b confirming the three negative control PVC designs used throughout the study ( $\Delta pvc13$ , truncated *pvc13*, and  $\Delta pvc10$ ) still load payload proteins.

**a**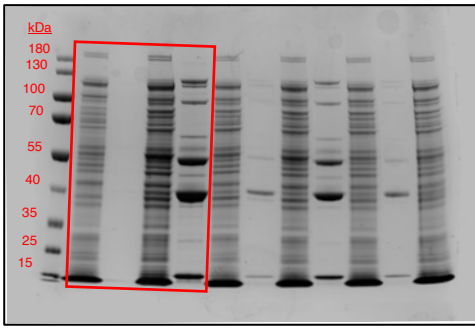**b**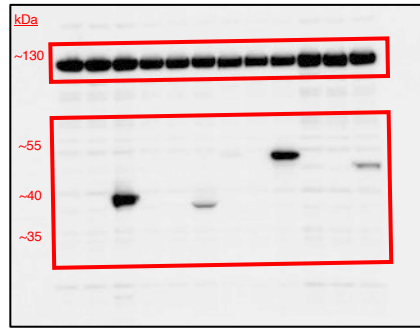**c**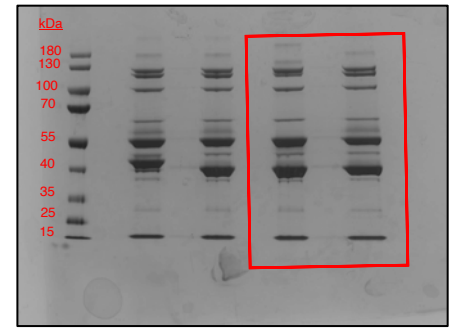**d**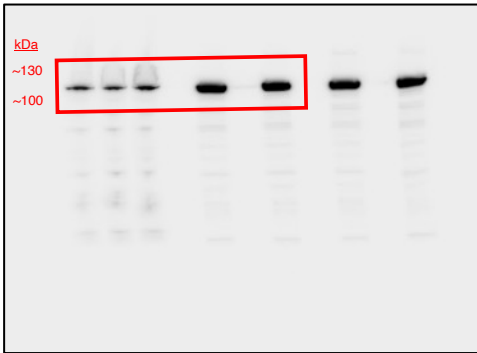**e**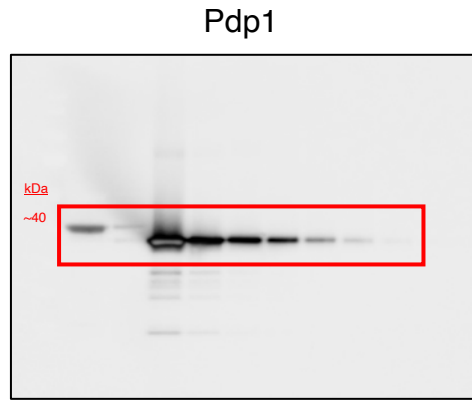**f**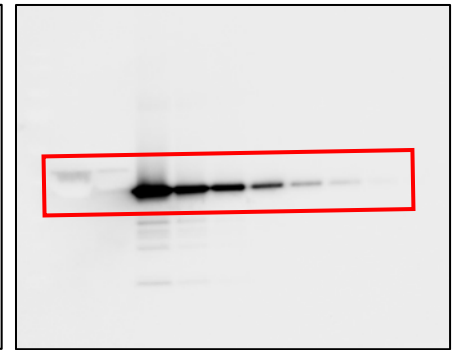**f**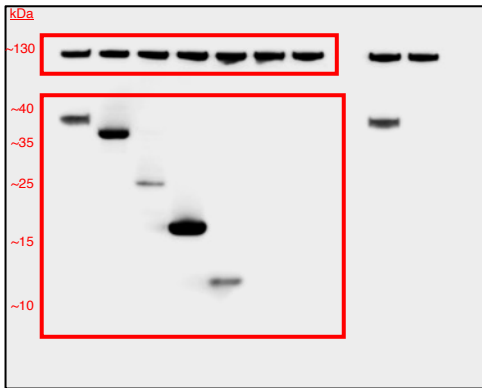**g**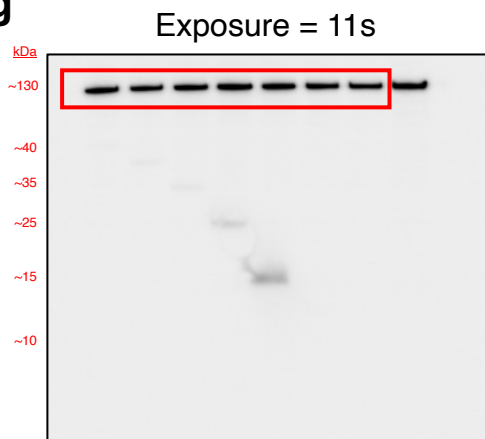**g**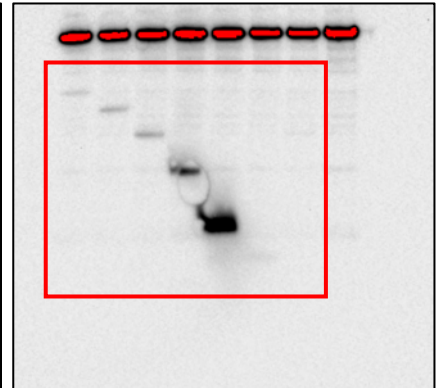**h**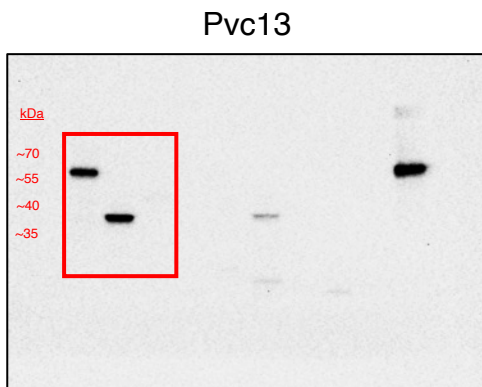**h**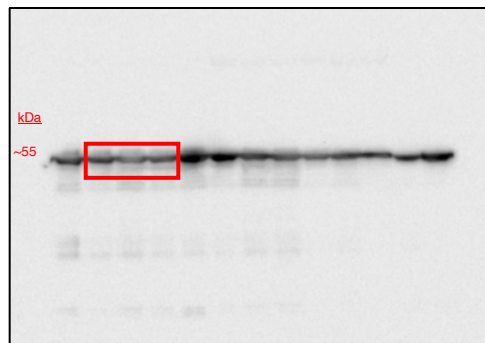**i**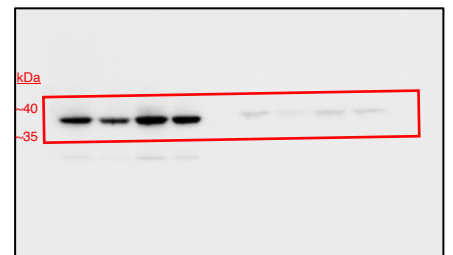

## Supplementary Tables

**Supplementary Table 1** | Amino acid sequence of a PVC tail fiber retargeted with an expanded host-range Ad5 knob domain.

- Pvc13(NTD+shaft) - 2xGGSSGG linker - Ad5 knob domain (with RGD and PK7 modifications) - 2xGGSSGG linker - Pvc13(CTD)

MNETRYNATVQEQQTLNPKAVGPDIDKLDKDFKEGSIPLQTFNELIDIADIGRKACGQAPQQ  
NGPGEGLKLADDGTLNLKIGTFSNKDFSPLILKDDVLSVDLGSGLTNETNGICVGGQGDGITVNT  
SNVAVKQGNNGISVTSSGGVAVKVSANKGLSVDSSGVAVKVNTDKGISVDGNGVAVKVNTSKGIS  
VDNTGVAVIANASKGISVDGSGVAVIANTSKGISVDGSGVAVIANTSKGISVDNTGVAVIANAS  
KGISVDGSGVAVIANTSKGISVDGSGVAVIANTSKGISVDSSGVAVKVKANGGIKVDANGVAID  
PNNVLPKGVIVMFSGSTAPTGWALCDGNNGTPNLIIDRFILGGKGT DINGVSTNTASGTKNSKLF  
DFSSDEATLTIDGKTLGRGGSSGGSSGGNDKLT LWTPAPSPNCRLNAEKDAKLT LVLT KCGSQ  
ILATVSVLAVKGLAPISGTVQSAHLIIRFDENGVLNNSFLDPEYWNFRNGDLTEGTAYTNAV  
GFMPNLSAYPKSHGKTAKSNIVSQVYLNKDKTKPVTLTITLNGTQETGDTTACDCRGDCFCGPS  
AYSMSFSWDWSGHNYINEIFATSSYTF SYIAQEGSGSGSGSGSKKKKKKKGGSSGGSSGGHDHD  
IKITGTGKSHKKNKVTVPYYILAFIIKL

**Supplementary Table 2** | Amino acid sequence of a PVC tail fiber retargeted with an anti-EGFR DARPin.

- Pvc13(NTD+shaft) - 2xGGSSGG linker - E01 anti-EGFR DARPin - 2xGGSSGG linker - Pvc13(CTD)

MNETRYNATVQEQQTLNPKAVGPDIDKLDKDFKEGSIPLQTFNELIDIADIGRKACGQAPQQ  
NGPGEGLKLADDGTLNLKIGTFSNKDFSPLILKDDVLSVDLGSGLTNETNGICVGGQGDGITVNT  
SNVAVKQGNNGISVTSSGGVAVKVSANKGLSVDSSGVAVKVNTDKGISVDGNGVAVKVNTSKGIS  
VDNTGVAVIANASKGISVDGSGVAVIANTSKGISVDGSGVAVIANTSKGISVDNTGVAVIANAS  
KGISVDGSGVAVIANTSKGISVDGSGVAVIANTSKGISVDSSGVAVKVKANGGIKVDANGVAID  
PNNVLPKGVIVMFSGSTAPTGWALCDGNNGTPNLIIDRFILGGKGT DINGVSTNTASGTKNSKLF  
DFSSDEATLTIDGKTLGRGGSSGGSSGGDLGKLLLEAARAGQDDEVRI LMANGADV NADDTWGW  
TPLHLAAYQGHLEIVEVLLKNGADV NAYDYIGW TPLHLAADGHLEIVEVLLKNGADV NASDYIG  
DTPLHLAAHNGHLEIVEVLLKHGADV NAQDKFGKTAFDISIDNGNEDLAEILQGGSSGGSSGGH  
DHDIKITGTGKSHKKNKVTVPYYILAFIIKL



**Supplementary Table 5** | Amino acid sequence of a protein payload (zinc finger deaminase) modified for loading and delivery via a PVC.

- Pdp1\_NTD - 3xGGSSGG linker - FLAG - SV40 NLS - ZFD

MPRYANYQINPKQNIKNSHGKSSSSDFSSGYLSFSNNSLDDPFIRQQVKREFIWEGHMKEIEEA  
SRLGGSSGGSSGGSSGGSDYKDDDDKDMAPKKKRKVGIGHVPAAMGGSYALGPYQISAPQLPAY  
NGQTVGTFYYVNDAGGLESKVFSSGGPTYPYNYANAGHVEGQSALFMRDNGISEGLVFHNNPEG  
TCGFCVMNMTETLLPENAKMTVVPPEGSGTPHEVGVYTLSGTPHEVGVYTLFQCRICMRKFATSG  
SLTRHTKIHTGEKPFQCRICMRNFSRSDHLSTHIRTHTGEKPFACDICGRKFATSSNRTKHTKI  
HTHPRAPIPKPFQCRICMRNFSRSDNLSEHIRTHTGEKPFACDICGRKFAWHSSLRVHTKIHLR  
SGGSTNLSDIIEKETGKQLVIQESILMLPEEVEEVIGNKPESDILVHTAYDESTDENVMLLTSD  
APEYKPWALVIQDSNGENKIKML

**Supplementary Table 6** | Amino acid sequence of the PVC sheath protein (Pvc2) tagged with FLAG for IF detection of PVC particles.

- FLAG - G - Pvc2

MDYKDDDDKGTTVTSYPGVYIEELNSLALSVSNSATAVPVFAVDEQNQYI SEDNAIRINSWMDY  
LNLIGNFN NEDKLDVSVRAYFANGGGYCYLVKTT SLEKI IPTLDDVTLLVAAGEDIKTTVDVLC  
QPGKGLFAVFDGPETELTINGAEAAKQAYTATPFAAVYYPWLKADWANIDIPPSAVMAGVYASV  
DLSRGVWKAPANVALKGGLEPKFLVTDELQGEYNTGRAINMIRNFSNTGTTVWGARTLEDKDNW  
RYVPPVRRLFNSVERDIKRAMSFAMFEPNNQPTWERVRAAISNYLYSLWQQGGLAGSKEEDAYFV  
QIGKGITMTQEQIDAGQMIVKVGLAAVRPAEFIILQFTQDVEQR



**Supplementary Table 7** | Summary of plasmids used in this study (annotated GenBank files provided in Supplementary Data 1).

| <b>ID</b> | <b>Plasmid name</b>   | <b>Type</b> | <b>Source</b> | <b>Description</b>                                                                                                                                    |
|-----------|-----------------------|-------------|---------------|-------------------------------------------------------------------------------------------------------------------------------------------------------|
| 1         | pAWP78-PVCpnf1-16     | pPVC        | This work     | Unmodified pPVC; contains WT PVC structural/accessory genes                                                                                           |
| 2         | pBR322-PVCpnf17-22    | pPayload    | This work     | Unmodified pPayload; contains WT PVC payloads/regulatory genes                                                                                        |
| 3         | pBR322-PVCpnf18-21    | pPayload    | This work     | Contains only regulatory genes; for generating empty PVCs                                                                                             |
| 4         | pBR322-Pdp1_NTD-Cre   | pPayload    | This work     | For loading Cre into PVCs; also contains regulatory genes                                                                                             |
| 5         | pBR322-Pdp1_NTD-Cas9  | pPayload    | This work     | For loading SpCas9 into PVCs; also contains regulatory genes                                                                                          |
| 6         | pBR322-Pdp1_NTD-ZFD_L | pPayload    | This work     | For loading L half of zinc finger deaminase targeting human TRAC locus (ZFD_TRAC-NC-Left-G1397-N_DddA) <sup>4</sup> ; also contains regulatory genes  |
| 7         | pBR322-Pdp1_NTD-ZFD_R | pPayload    | This work     | For loading R half of zinc finger deaminase targeting human TRAC locus (ZFD_TRAC-NC-Right-G1397-C_DddA) <sup>4</sup> ; also contains regulatory genes |
| 8         | pIEx4-Dio-GFP         | N/A         | This work     | Cre reporter for insect cells; double-floxed-EGFP; generated using RV-Cag-Dio-GFP <sup>5</sup>                                                        |
| 9         | pcDNA3-Dio-GFP        | N/A         | This work     | Cre reporter for mammalian cells; double-floxed-EGFP; generated using RV-Cag-Dio-GFP <sup>5</sup>                                                     |
| 10        | pIEx4-Cre             | N/A         | This work     | Expresses Cre in insect cells; positive control for Cre-GFP assay; for threshold setting in flow cytometry                                            |
| 11        | pcDNA3-Cre            | N/A         | This work     | Expresses Cre in mammalian cells; positive control for Cre-GFP assay; for threshold setting in flow cytometry                                         |
| 12        | py100-sgRNA_hVEGFA    | N/A         | This work     | Expression of SpCas9 guide RNA specific for human VEGFA locus                                                                                         |
| 13        | pAWP78-PVCpnfΔpvc13   | pPVC        | This work     | Produces PVCs lacking tail fibers                                                                                                                     |
| 14        | pAWP78-PVCpnfΔpvc15   | pPVC        | This work     | Produces PVCs lacking payloads by elimination of the payload loader ( <i>pvc15</i> )                                                                  |

|    |                                      |      |           |                                                                                                                                        |
|----|--------------------------------------|------|-----------|----------------------------------------------------------------------------------------------------------------------------------------|
| 15 | pAWP78-PVCpnf_FLAG-pvc2              | pPVC | This work | Contains an external epitope tag on the sheath protein; for immunofluorescence-based binding assays                                    |
| 16 | pAWP78-PVCpnf_pvc13-truncated        | pPVC | This work | Contains a tail fiber with a truncated binding domain (lacking aa403-476 in Pvc13); produces nontargeting PVCs                         |
| 17 | pAWP78-PVCpnf_pvc13-E01DARPin        | pPVC | This work | Produces PVCs retargeted with anti-EGFR DARPin E01 <sup>6</sup>                                                                        |
| 18 | pAWP78-PVCpnf_pvc13-A4DARPin         | pPVC | This work | Produces PVCs retargeted with anti-lysozyme DARPin A4 <sup>7</sup> ; used as a negative control for DARPin retargeting method          |
| 19 | pAWP78-PVCpnf_pvc13-Ad5Knob          | pPVC | This work | Produces PVCs retargeted with knob domain from hAd5 virus                                                                              |
| 20 | pAWP78-PVCpnf_pvc13-Ad5DL491-492     | pPVC | This work | Produces PVCs retargeted with non-binding mutant of Ad5 knob <sup>8</sup> ; used as a negative control for Ad5 knob retargeting method |
| 21 | pAWP78-PVCpnf_pvc13-Ad5RGDPK7        | pPVC | This work | Produces PVCs retargeted with expanded tropism hAd5 knob (RGD and PK7 insertions) <sup>9</sup>                                         |
| 22 | pAWP78-PVCpnf_pvc13-antiMouseMHCIINb | pPVC | This work | Produces PVCs retargeted with VHH7 anti-mouse MHC class II nanobody <sup>10</sup>                                                      |
| 23 | pAWP78-PVCpnf_pvc13-antiHistoneNb    | pPVC | This work | Produces PVCs retargeted with A9 anti-histone nanobody <sup>11</sup> ; used as a negative control for Nb retargeting method            |
| 24 | pAWP78-PVCpnf_pvc13-CD4DARPin        | pPVC | This work | Produces PVCs retargeted with anti-CD4 DARPin D27.2 <sup>12</sup> ; for killing Jurkat cells                                           |
| 25 | pAWP78-PVCpnf_pvc13-CD11bDARPin      | pPVC | This work | Produces PVCs retargeted with anti-CD11b DARPin F7 <sup>13</sup> ; negative control for Jurkat killing assay                           |
| 26 | pAWP78-PVCpnf_pvc13-HA               | pPVC | This work | Produces PVCs retargeted with HA tag                                                                                                   |
| 27 | pAWP78-PVCpnf_pvc13-FLAG             | pPVC | This work | Produces PVCs retargeted with FLAG tag                                                                                                 |
| 28 | pAWP78-PVCpnf_pvc13-EE               | pPVC | This work | Produces PVCs retargeted with EE tag                                                                                                   |
| 29 | pAWP78-PVCpnf_pvc13-MoonTag          | pPVC | This work | Produces PVCs retargeted with MoonTag <sup>14</sup>                                                                                    |
| 30 | pAWP78-PVCpnf_pvc13-SunTag           | pPVC | This work | Produces PVCs retargeted with SunTag <sup>15</sup>                                                                                     |
| 31 | pAWP78-PVCpnf_pvc13-ALFA             | pPVC | This work | Produces PVCs retargeted with ALFA tag <sup>16</sup>                                                                                   |

|    |                                 |          |                          |                                                                                                                                  |
|----|---------------------------------|----------|--------------------------|----------------------------------------------------------------------------------------------------------------------------------|
| 32 | pHCMV-SS-antiHAscFv-TM          | N/A      | Gift from D. Streibinger | Displays anti-HA scFv <sup>17</sup> from the surface of mammalian cells                                                          |
| 33 | pHCMV-SS-antiFLAGscFv-TM        | N/A      | This work                | Displays anti-FLAG scFv <sup>18</sup> from the surface of mammalian cells                                                        |
| 34 | pHCMV-SS-antiEEscFv-TM          | N/A      | This work                | Displays anti-EE scFv <sup>19</sup> from the surface of mammalian cells                                                          |
| 35 | pHCMV-SS-antiMoonTagNb-TM       | N/A      | This work                | Displays anti-MoonTag nanobody <sup>14</sup> from the surface of mammalian cells                                                 |
| 36 | pHCMV-SS-antiSunTag-TM          | N/A      | This work                | Displays anti-SunTag scFv <sup>15</sup> from the surface of mammalian cells                                                      |
| 37 | pHCMV-SS-antiALFAtagNb-TM       | N/A      | This work                | Displays anti-ALFA nanobody <sup>16</sup> from the surface of mammalian cells                                                    |
| 38 | pAWP78-PVCpnf_pvc12-HiBiT       | pPVC     | This work                | Produces PVCs tagged with HiBiT on the baseplate; used as assembly/loading control for payload loading assays                    |
| 39 | pAWP78-PVCpnfΔpvc15_pvc12-HiBiT | pPVC     | This work                | Negative control for payload loading assay; produces PVCs deficient for payload loader ( <i>pvc15</i> )                          |
| 40 | pBR322-Pdp1-HiBiT               | pPayload | This work                | Loads HiBiT-tagged Pdp1 into PVCs; for payload loading assays; also contains Pnf                                                 |
| 41 | pBR322-Pdp1_aa1-289-HiBiT       | pPayload | This work                | Loads a truncated payload; for identification of Pdp1 packaging domain                                                           |
| 42 | pBR322-Pdp1_aa1-190-HiBiT       | pPayload | This work                | Loads a truncated payload; for identification of Pdp1 packaging domain                                                           |
| 43 | pBR322-Pdp1_aa1-133-HiBiT       | pPayload | This work                | Loads a truncated payload; for identification of Pdp1 packaging domain                                                           |
| 44 | pBR322-Pdp1_aa1-76-HiBiT        | pPayload | This work                | Loads a truncated payload; for identification of Pdp1 packaging domain                                                           |
| 45 | pBR322-Pdp1_aa1-38-HiBiT        | pPayload | This work                | Loads a truncated payload; for identification of Pdp1 packaging domain                                                           |
| 46 | pBR322-Pdp1_aa39-331-HiBiT      | pPayload | This work                | Loads a truncated payload; for identification of Pdp1 packaging domain                                                           |
| 47 | pBR322-Pdp1_NTD-GFP-HiBiT       | pPayload | This work                | Loads HiBiT-tagged GFP into PVCs using Pdp1 packaging domain; also contains Pnf                                                  |
| 48 | pBR322-Pdp1_NTD-Cre-HiBiT       | pPayload | This work                | Loads HiBiT-tagged Cre into PVCs using Pdp1 packaging domain; also contains Pnf                                                  |
| 49 | pBR322-Pdp1_NTD-ZFN_L-HiBiT     | pPayload | This work                | Loads HiBiT-tagged L fragment of a zinc finger nuclease specific for human AAVS1 locus <sup>20</sup> using Pdp1 packaging domain |

|    |                                                   |      |           |                                                                                                                                                        |
|----|---------------------------------------------------|------|-----------|--------------------------------------------------------------------------------------------------------------------------------------------------------|
| 50 | EGFR-GFP                                          | N/A  | Ref. 21   | Displays EGFR from the surface of mammalian cells; used to sensitize EGFR-deficient cells to EGFR-targeting PVCs                                       |
| 51 | TwinStrep-SUMO-Pdp1                               | N/A  | This work | For affinity purification of Pdp1 payload                                                                                                              |
| 52 | TwinStrep-SUMO-Pnf                                | N/A  | This work | For affinity purification of Pnf payload                                                                                                               |
| 53 | pAWP78-PVCpnfΔpvc10                               | pPVC | This work | Produces PVCs containing a truncated spike tip protein (Pvc10)                                                                                         |
| 54 | pAWP78-PVCpnfΔpvc10_<br>pvc13-Ad5RGDPK7           | pPVC | This work | Produces PVCs retargeted with expanded tropism hAd5 knob (RGD and PK7 insertions) <sup>9</sup> , also containing a truncated spike tip protein (Pvc10) |
| 55 | pAWP78-PVCpnfΔpvc10_<br>pvc13-<br>antiMouseMHCIIb | pPVC | This work | Produces PVCs retargeted with VHH7 anti-mouse MHC class II nanobody <sup>10</sup> , also containing a truncated spike tip protein (Pvc10)              |

**Supplementary Table 8** | Cell lines used in this study.

| Cell line              | Organism                        | Source                     | Media         |
|------------------------|---------------------------------|----------------------------|---------------|
| Sf9                    | Insect ( <i>S. frugiperda</i> ) | Sigma-Aldrich<br>71104M    | ESF921        |
| A549                   | Human ( <i>H. sapiens</i> )     | ATCC CCL-185               | RPMI+GlutaMAX |
| U2OS                   | Human ( <i>H. sapiens</i> )     | ATCC HTB-96                | DMEM+GlutaMAX |
| HEK293FT               | Human ( <i>H. sapiens</i> )     | ThermoFisher<br>R70007     | DMEM+GlutaMAX |
| A549-LoxP-GFP          | Human ( <i>H. sapiens</i> )     | Gift from D.<br>Strebinger | RPMI+GlutaMAX |
| Jurkat                 | Human ( <i>H. sapiens</i> )     | ATCC TIB-152               | RPMI+GlutaMAX |
| N2a                    | Mouse ( <i>M. musculus</i> )    | ATCC CCL-131               | DMEM+GlutaMAX |
| NIH/3T3                | Mouse ( <i>M. musculus</i> )    | ATCC CRL-1658              | DMEM+GlutaMAX |
| A20                    | Mouse ( <i>M. musculus</i> )    | ATCC TIB-208               | RPMI+GlutaMAX |
| J774A.1                | Mouse ( <i>M. musculus</i> )    | ATCC TIB-67                | DMEM+GlutaMAX |
| Primary<br>splenocytes | Mouse ( <i>M. musculus</i> )    | Gift from B. Lash          | RPMI+GlutaMAX |

**Supplementary Table 9** | NGS primer sequences.

| <b>Target</b>   | <b>Guide sequence</b> | <b>NGS primer sequences</b>                            |
|-----------------|-----------------------|--------------------------------------------------------|
| <i>Hs Vegfa</i> | ggtgagtgagtgtgtcgtg   | F: tcttcgagagtgaggacgtgtg<br>R: tattggaatcctggagtgaccc |
| <i>Hs Trac</i>  | N/A                   | F: ctgggacatgcaagcccataac<br>R: tctcagagcttaggatgcacgc |

**Supplementary Table 10** | RT-qPCR primer sequences.

| <b>Target</b>            | <b>F primer sequence</b>  | <b>R primer sequence</b> |
|--------------------------|---------------------------|--------------------------|
| <i>pvc1</i>              | tggttcaaaatgccgggtcaga    | aacagttctgtttccccgg      |
| <i>pvc2</i>              | gggggattagctggcagcaaag    | gccctgcatcaatctgtcctg    |
| <i>pvc3</i>              | caaaatggcggaggagcttct     | cagatcgagttccgggcaaacc   |
| <i>pvc4</i>              | gtccgtatcgacagttggccg     | atgcctgttcccgccattatc    |
| <i>pvc5</i>              | ttaaccgcattcccgatccgc     | acgggcattttctcctccctca   |
| <i>pvc6</i>              | ggtagtgccatcaaacgaccg     | cccaagtcgectcatccagact   |
| <i>pvc7</i>              | acccccattgaagagcagctca    | ttccaacgcattttgccccat    |
| <i>pvc8</i>              | acttttggccgcggtagatgtg    | cctacctgacagtgggccagtt   |
| <i>pvc9</i>              | gtcgtggttgggcttttctcc     | ataagacgttccccggctcag    |
| <i>pvc10</i>             | aggcccttcagtgtaccagtgg    | gtaacatccggttgtggcggag   |
| <i>pvc11</i>             | caccagagtgccagcattggag    | gccatctctgcagacgagcag    |
| <i>pvc12</i>             | ggctcagtgaatgatgacgcc     | cgctgtgtgccaagtaacca     |
| <i>pvc13</i>             | agagggcagtattcccctgcaa    | cgcttgaccacaggctttacgt   |
| <i>pvc14</i>             | agcccgttgcatcctgaaca      | cggcattaaactgggcctgacg   |
| <i>pvc15</i>             | gctgaccacattggcgttgact    | gcatcctgttccgccaatcga    |
| <i>pvc16</i>             | ggtaatcgcccacggctttctc    | gaagaaaccgcggtaccggag    |
| <i>Pdp1</i>              | aaaaactggccgccttttgggt    | ggctgagagactcgcttccaga   |
| <i>PAU_RS16570</i>       | tggaggaagggttagttcac      | acaggcccatagtccaggcaa    |
| <i>PAU_RS16565</i>       | gggggaagggtaaatgagaata    | cgagttttcgggggcaattat    |
| <i>PAU_RS16560</i>       | acagtcaccgatttgccgaagc    | ccttctctgttaaagccaatccc  |
| <i>PAU_RS24015</i>       | ggctgtttcattcacctcagtcaca | atttcgagttgcagcacgacgg   |
| <i>Pnf</i>               | gccctttcgccgatagtgaaac    | tcagcaactcccgttttcccat   |
| <i>gapA<sup>22</sup></i> | gattacatggcatacatgctg     | cagacgaacggctcaggtcaa    |

**Supplementary Table 11** | Endotoxin measurements for PVCs used in the immune response assays in Fig. 4e and Extended Data Fig. 8e-f.

| <b>Sample</b>                    | <b>Endotoxin concentration (EU/mL)</b> |
|----------------------------------|----------------------------------------|
| PVC (Ad5 RGD/PK7)                | 0.674                                  |
| PVC (Ad5 RGD/PK7) $\Delta pvc10$ | 0.422                                  |
| Control injection                | 0.500                                  |

**Supplementary Table 12** | Antibodies used for flow cytometry during mouse experiments.

| <b>Epitope</b>           | <b>Conjugate</b> | <b>Order number</b> | <b>Manufacturer</b>     | <b>Dilution used</b> |
|--------------------------|------------------|---------------------|-------------------------|----------------------|
| Mouse CD45               | BV510            | 103138              | BioLegend               | 1:200                |
| Mouse/human CD11b        | APC              | 101212              | BioLegend               | 1:50                 |
| Mouse Ly-6G/Ly-6C (Gr-1) | FITC             | 108406              | BioLegend               | 1:100                |
| Mouse O4                 | APC              | 130-119-982         | Miltenyi Biotec         | 1:100                |
| Mouse GFAP               | Alexa Fluor 647  | 51-9792-82          | ThermoFisher Scientific | 1:100                |
| Mouse CD3                | BV650            | 100229              | BioLegend               | 1:200                |
| Mouse CD4                | PerCP            | 553052              | BD                      | 1:100                |
| Mouse CD8                | APC-Cy7          | 560182              | BD                      | 1:100                |

## Supplementary Data

**Supplementary Data 1 (separate file)** | Annotated sequence files for plasmids listed in Supplementary Table 7.

**Supplementary Data 2 (separate file)** | Mass spectrometry analysis of a purified PVC sample.

## References

1. Peng, K., Radivojac, P., Vucetic, S., Dunker, A. K. & Obradovic, Z. Length-dependent prediction of protein intrinsic disorder. *BMC Bioinformatics* **7**, 208 (2006).
2. Will, E. *et al.* Unmodified Cre recombinase crosses the membrane. *Nucleic Acids Res.* **30**, e59 (2002).
3. Kirby, I. *et al.* Identification of Contact Residues and Definition of the CAR-Binding Site of Adenovirus Type 5 Fiber Protein. *J. Virol.* **74**, 2804–2813 (2000).
4. Lim, K., Cho, S.-I. & Kim, J.-S. Nuclear and mitochondrial DNA editing in human cells with zinc finger deaminases. *Nat. Commun.* **13**, 366 (2022).
5. Ciceri, G. *et al.* Lineage-specific laminar organization of cortical GABAergic interneurons. *Nat. Neurosci.* **16**, 1199–1210 (2013).
6. Steiner, D., Forrer, P. & Plückthun, A. Efficient Selection of DARPins with Sub-nanomolar Affinities using SRP Phage Display. *J. Mol. Biol.* **382**, 1211–1227 (2008).
7. Fischer, G., Hogan, B.J., Houlihan, G., Edmond, S., Huovinen, T.T.K., Hollfelder, F., Hyvonen, M. Designed Ankyrin Repeat Protein (DARPin) A4 in complex with Lysozyme. (2018).
8. Kirby, I. *et al.* Mutations in the DG Loop of Adenovirus Type 5 Fiber Knob Protein Abolish High-Affinity Binding to Its Cellular Receptor CAR. *J. Virol.* **73**, 9508–9514 (1999).
9. Wu, H. *et al.* Double Modification of Adenovirus Fiber with RGD and Polylysine Motifs Improves Coxsackievirus–Adenovirus Receptor-Independent Gene Transfer Efficiency. *Hum. Gene Ther.* **13**, 1647–1653 (2002).
10. Rashidian, M. *et al.* Noninvasive imaging of immune responses. *Proc. Natl. Acad. Sci.* **112**, 6146–6151 (2015).

11. Moeglin, E. *et al.* A Novel Nanobody Precisely Visualizes Phosphorylated Histone H2AX in Living Cancer Cells under Drug-Induced Replication Stress. *Cancers* **13**, 3317 (2021).
12. Schweizer, A. *et al.* CD4-Specific Designed Ankyrin Repeat Proteins Are Novel Potent HIV Entry Inhibitors with Unique Characteristics. *PLoS Pathog.* **4**, e1000109 (2008).
13. Siegel, P. M. *et al.* A DARPIn targeting activated Mac-1 is a novel diagnostic tool and potential anti-inflammatory agent in myocarditis, sepsis and myocardial infarction. *Basic Res. Cardiol.* **116**, 17 (2021).
14. Boersma, S. *et al.* Multi-Color Single-Molecule Imaging Uncovers Extensive Heterogeneity in mRNA Decoding. *Cell* **178**, 458-472.e19 (2019).
15. Tanenbaum, M. E., Gilbert, L. A., Qi, L. S., Weissman, J. S. & Vale, R. D. A protein tagging system for signal amplification in gene expression and fluorescence imaging. *Cell* **159**, 635–646 (2014).
16. Götzke, H. *et al.* The ALFA-tag is a highly versatile tool for nanobody-based bioscience applications. *Nat. Commun.* **10**, 4403 (2019).
17. Zhao, N. *et al.* A genetically encoded probe for imaging nascent and mature HA-tagged proteins in vivo. *Nat. Commun.* **10**, 2947 (2019).
18. Liu, Y. *et al.* Visualizing looping of two endogenous genomic loci using synthetic zinc-finger proteins with anti-FLAG and anti-HA frankenbodies in living cells. *Genes Cells Devoted Mol. Cell. Mech.* **26**, 905–926 (2021).
19. Kalyoncu, S. *et al.* Effects of protein engineering and rational mutagenesis on crystal lattice of single chain antibody fragments. *Proteins* **82**, 1884–1895 (2014).
20. Hockemeyer, D. *et al.* Highly efficient gene targeting of expressed and silent genes in human ESCs and iPSCs using zinc finger nucleases. *Nat. Biotechnol.* **27**, 851–857 (2009).



21. Carter, R. E. & Sorokin, A. Endocytosis of functional epidermal growth factor receptor-green fluorescent protein chimera. *J. Biol. Chem.* **273**, 35000–35007 (1998).
22. Jandu, N. *et al.* Enterohemorrhagic *Escherichia coli* O157:H7 Gene Expression Profiling in Response to Growth in the Presence of Host Epithelia. *PLOS ONE* **4**, e4889 (2009).
